# Supplementary material for: Facile synthesis of 3D plum candy-like ZnCo2O4 microspheres as a high-performance anode for lithium ion batteries
Source: Royal Society of Chemistry journal article supplement (doi:10.1039/c6ra17316k), 2016-01-01
Supplement: c6ra17316k1.pdf [file c6ra17316k1.pdf]

# Supporting information

## Facile synthesis of 3D plum candy-like $\text{ZnCo}_2\text{O}_4$ microspheres as a high-performance anode for lithium ion batteries

Binbin Fan, Xiaohua Chen\*, Aiping Hu, Qunli Tang, Haining Fan, Zheng Liu, Kuikui Xiao

College of Materials Science and Engineering, Hunan University, Hunan Province Key Laboratory for Spray Deposition Technology and Application, Changsha 410082, China.

E-mail: xiaohuachen@hnu.edu.cn

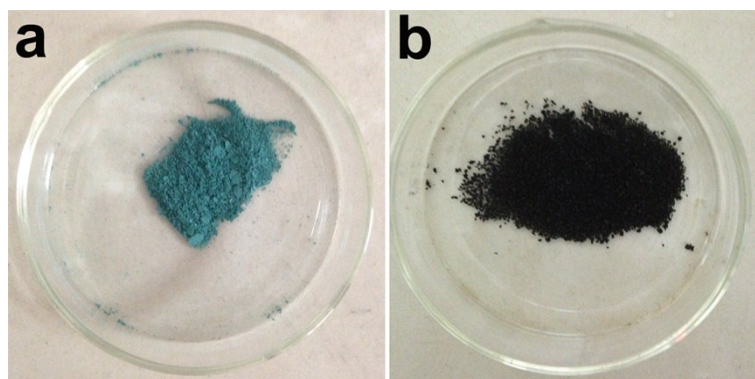

**Fig.S1** the photographs of as-prepared  $\text{Zn}_x\text{Co}_{1-x}\text{O}$  before calcination at air (a) and 3D plum candy-like ZCO MSs

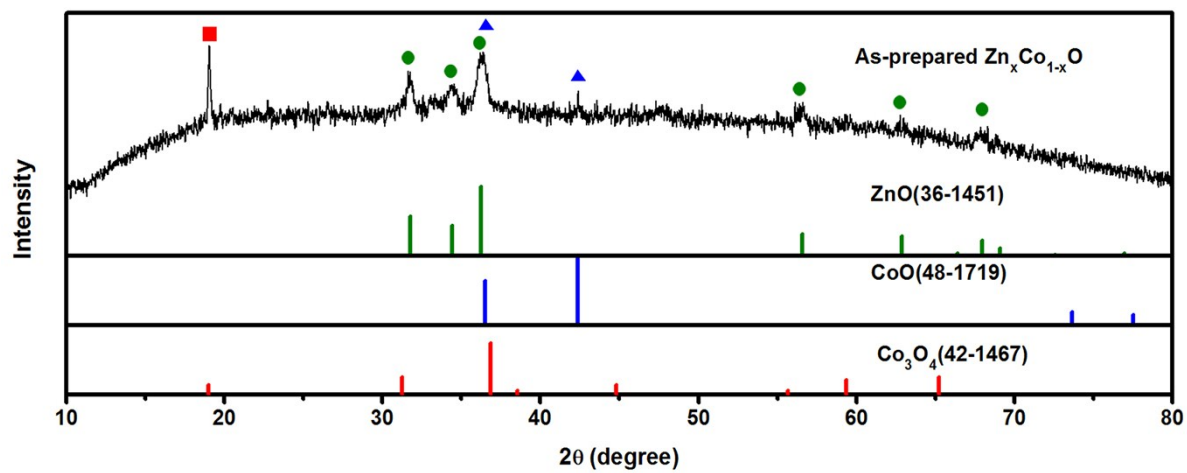

**Fig. S2** XRD patterns of as-prepared  $\text{Zn}_x\text{Co}_{1-x}\text{O}$

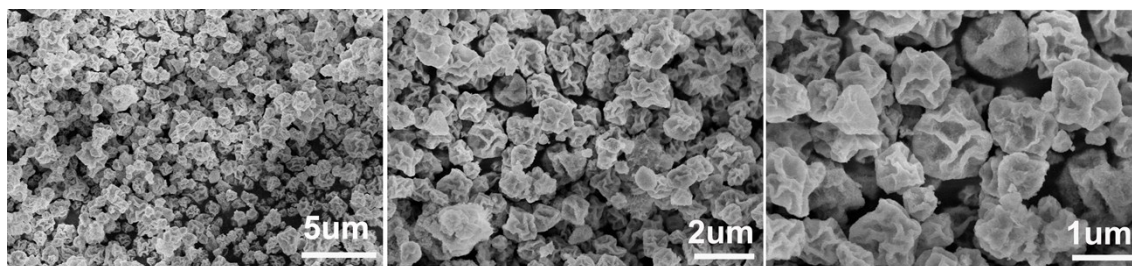

**Fig.S3** SEM images of as-prepared  $\text{Zn}_x\text{Co}_{1-x}\text{O}$

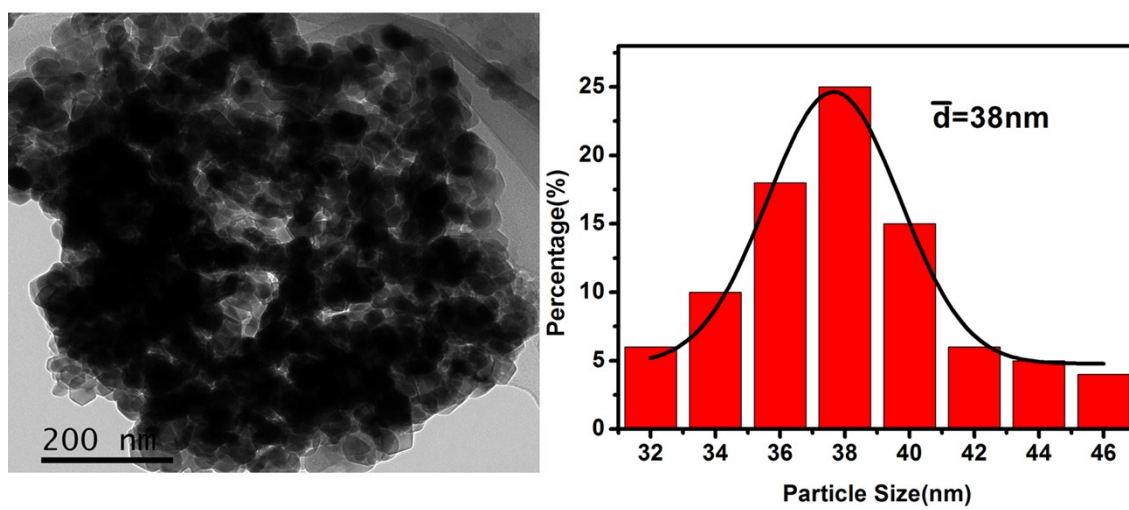

**Fig. S4** TEM image of 3D plum candy-like ZCO MSs and the particle size distribution statistical histogram

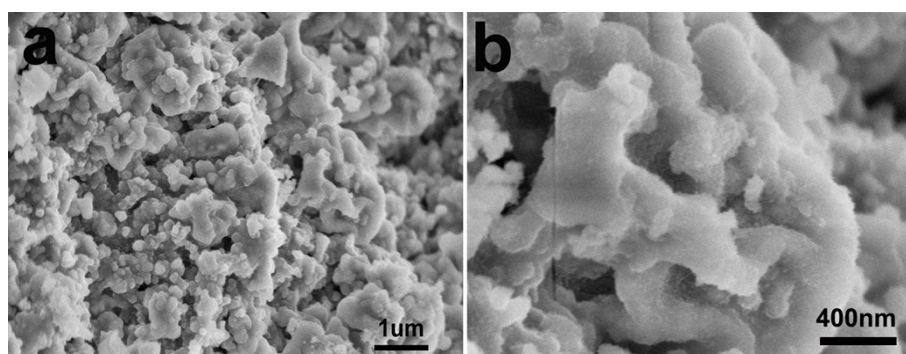

**Fig. S5** SEM images of electrode after 50 cycles at 500 mA g<sup>-1</sup>
